# Supplementary material
Source: publisher figshare collection journal article supplement (https://frontiersin.figshare.com/ndownloader/files/25874463)
Supplement: Supplementary file [file 25874463]

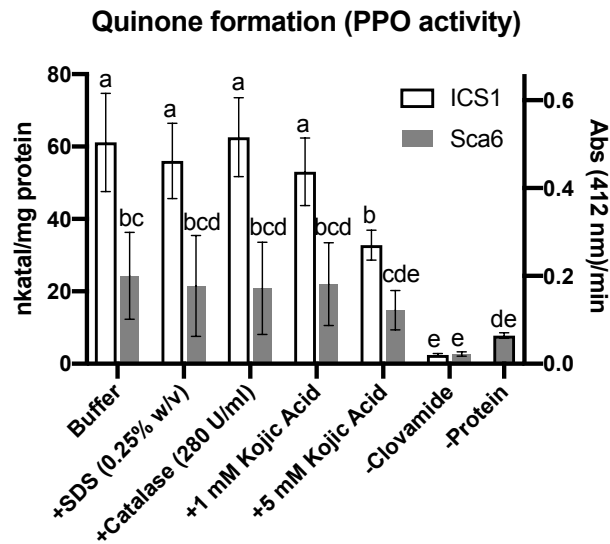

**Supplemental Figure 1.** Polyphenol oxidase (PPO) activity assay of stage C leaf protein extracts with controls. “Buffer” is control (McIlvaine’s buffer, pH 7). “SDS” = sodium dodecyl sulfate. “-Clovamide” represents protein only with no substrate. “-Protein” represent clovamide only with no added protein. One-way ANOVA was performed ( $p < 0.001$ ) and pairwise student’s t-test were used for multiple comparisons. Groups with the same letter are not significantly different ( $p < 0.1$ ). Error bars represent standard deviation.

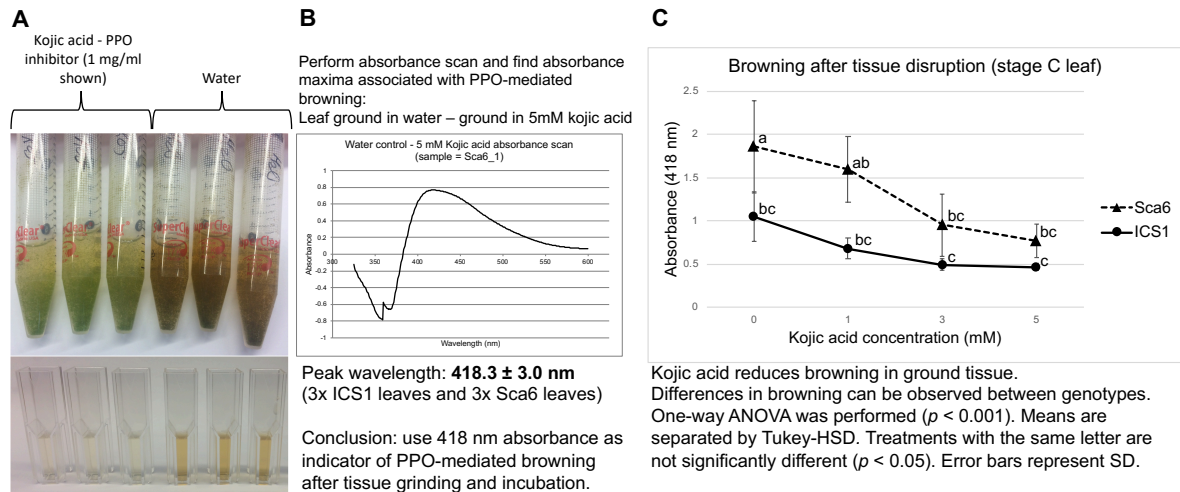

**Supplemental Figure 2.** Development of browning assay used for Figure 4C,D. **(A)** Example of supernatant browning of ground ‘Sca6’ stage C leaf with and without kojic acid (PPO inhibitor). **(B)** Example absorbance scan (325-600 nm) of stage C leaf disc ground in water minus stage C leaf disc ground in 5 mM kojic acid solution. Absorbance maximum (~418 nm) indicates PPO-mediated browning. **(C)** Demonstration that kojic acid reduces browning measurement ( $Abs_{418nm}$ ) in concentration-dependent manner and that ‘Sca6’ leaf discs produce more browning than ‘ICS1’.

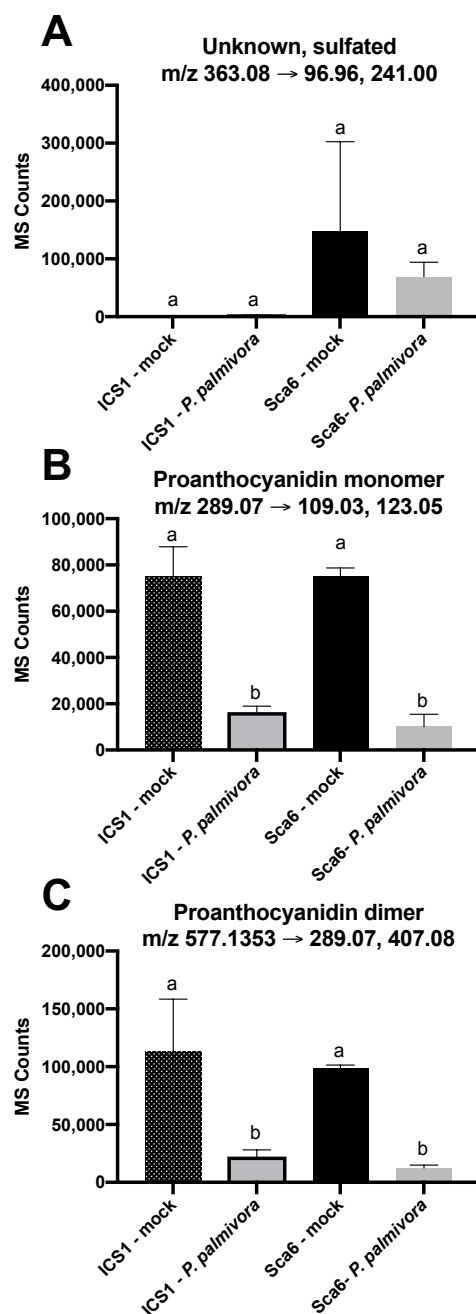

**Supplemental Figure 3.** Other metabolite features from LC-MS metabolomics of *P. palmivora* infection of pod that were indicated in the Loadings Chart (Fig. 7B). **(A)** Unknown sulfated metabolite. **(B)** A proanthocyanidin monomer (catechin or epicatechin). **(C)** A proanthocyanidin dimer (B type). MS Counts represent mass spectrometer signal intensity of peaks integrated in XCMS Online (Tautenhahn et al., 2012). Shared letters mean no difference by Tukey-HSD ( $p < 0.05$ ,  $n = 3$ ). Parent ion m/z values are suspected molecular ions ( $[M-H]^-$ ) in **(B)** and **(C)**. Error bars represent standard deviation.

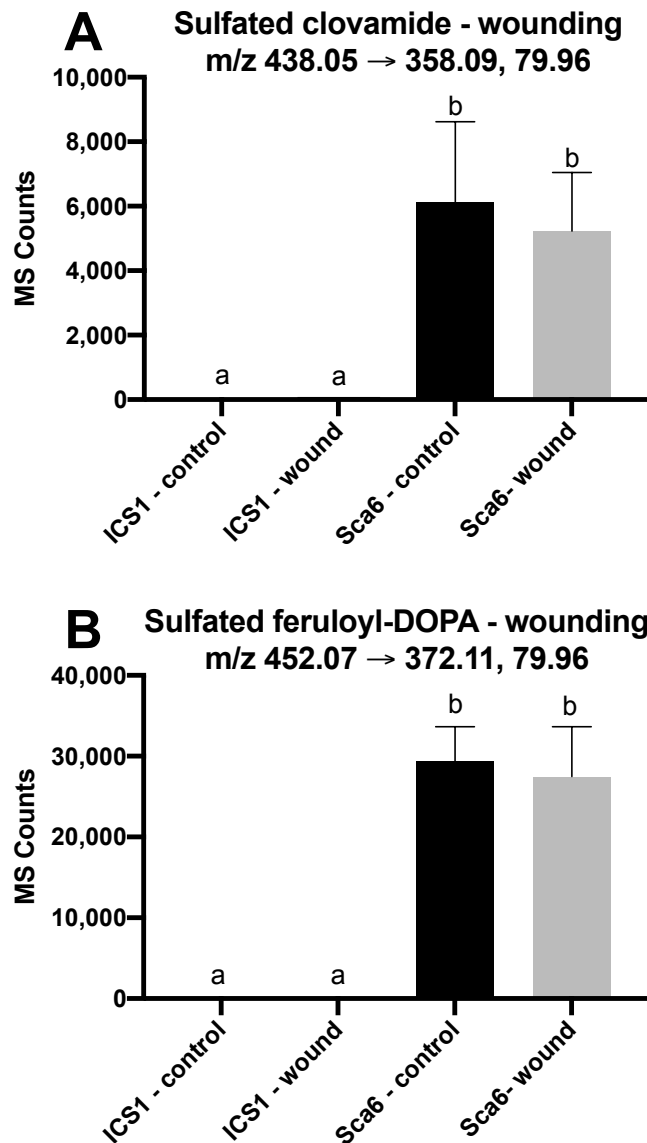

**Supplemental Figure 4:** Effect of wounding on two sulfated HCAAs in fruit/pod peel. **(A)** MS Signal of clovamide, arylsulfate in 'ICS1' and 'Sca6' control and wounded pods. **(B)** MS Signal of Feruloyl-DOPA, arylsulfate in 'ICS1' and 'Sca6' control and wounded pods. No induction of either compound by wounding was observed. Shared letters mean no difference by Tukey-HSD ( $p < 0.05$ ,  $n = 3$ ). Parent ion m/z values are suspected molecular ions ( $[M-H]^-$ ). Error bars represent standard deviation.

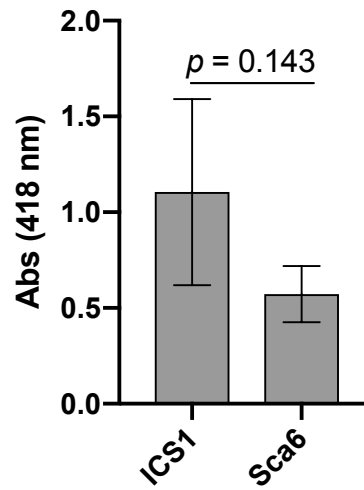

**Supplemental Figure 5:** Supernatant browning (Abs<sub>418nm</sub>) from grinding 'ICS1' or 'Sca6' pod tissue in water. T-test,  $n = 3$ . Error bars represent standard deviation.

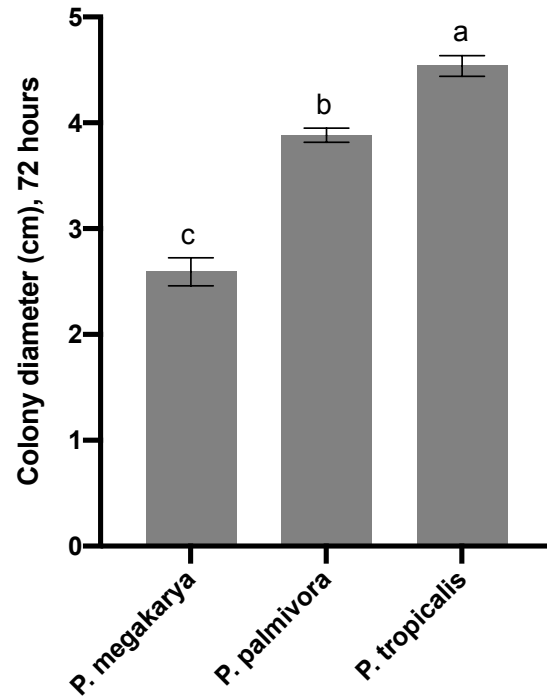

**Supplemental Figure 6.** Colony diameter of *P. megakarya*, *P. palmivora*, *P. tropicalis* in V8 media after 72 hours of growth. Shared letters mean no difference by Tukey-HSD ( $p < 0.01$ ,  $n = 8$ ). Error bars represent standard deviation.

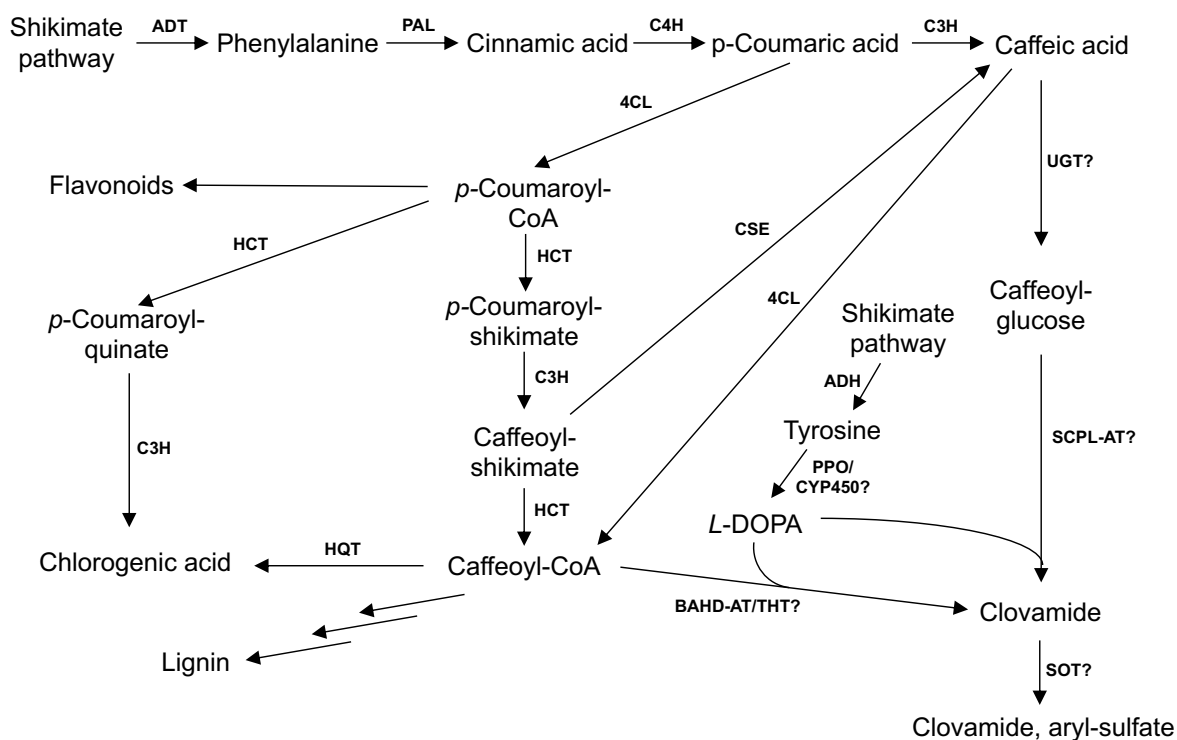

## References

- Araji, S., Grammer, T.A., Gertzen, R., Anderson, S.D., Mikulic-Petkovsek, M., Veberic, R., Phu, M.L., Solar, A., Leslie, C.A., Dandekar, A.M., *et al.* (2014). Novel roles for the polyphenol oxidase enzyme in secondary metabolism and the regulation of cell death in walnut. *Plant physiology* **164**, 1191-1203.
- Bouchez, P., Teixeira Benites, V., Baidoo, E.E.K., Mortimer, J.C., Sullivan, M.L., Scheller, H.V., and Eudes, A. (2019). Production of clovamide and its analogues in *Saccharomyces cerevisiae* and *Lactococcus lactis*. *Letters in Applied Microbiology* **69**, 181-189.
- D'Auria, J.C. (2006). Acyltransferases in plants: a good time to be BAHD. *Curr Opin Plant Biol* **9**, 331-340.
- Hirschmann, F., Krause, F., and Papenbrock, J. (2014). The multi-protein family of sulfotransferases in plants: composition, occurrence, substrate specificity, and functions. *Frontiers in plant science* **5**, 556.
- Knollenberg, B.J., Liu, J., Yu, S., Lin, H., and Tian, L. (2018). Cloning and functional characterization of a p-coumaroyl quinate/shikimate 3'-hydroxylase from potato (*Solanum tuberosum*). *Biochem Biophys Res Commun* **496**, 462-467.
- Payyavula, R.S., Shakya, R., Sengoda, V.G., Munyaneza, J.E., Swamy, P., and Navarre, D.A. (2015). Synthesis and regulation of chlorogenic acid in potato: Rerouting phenylpropanoid flux in HQT-silenced lines. *Plant biotechnology journal* **13**, 551-564.
- Petersen, M. (2016). Hydroxycinnamoyltransferases in plant metabolism. *Phytochemistry Reviews* **15**, 699-727.
- Polturak, G., Breitel, D., Grossman, N., Sarrion-Perdigones, A., Weithorn, E., Pliner, M., Orzaez, D., Granell, A., Rogachev, I., and Aharoni, A. (2016). Elucidation of the first committed step in betalain biosynthesis enables the heterologous engineering of betalain pigments in plants. *The New phytologist* **210**, 269-283.
- Qian, Y., Lynch, J.H., Guo, L., Rhodes, D., Morgan, J.A., and Dudareva, N. (2019). Completion of the cytosolic post-chorismate phenylalanine biosynthetic pathway in plants. *Nature Communications* **10**, 15.
- Sullivan, M.L., and Bonawitz, N.D. (2018). Spectrophotometric determination of reaction rates and kinetic parameters of a BAHD acyltransferase using DTNB (5, 5'-dithio-bis-[2-nitrobenzoic acid]). *Plant science* **269**, 148-152.
- Vanholme, R., Cesarino, I., Rataj, K., Xiao, Y., Sundin, L., Goeminne, G., Kim, H., Cross, J., Morreel, K., Araujo, P., *et al.* (2013). Caffeoyl Shikimate Esterase (CSE) Is an Enzyme in the Lignin Biosynthetic Pathway in *Arabidopsis*. *Science (New York, NY)* **341**, 1103.
